# Supplementary material for: Deoxynivalenol Affects Cell Metabolism and Increases Protein Biosynthesis in Intestinal Porcine Epithelial Cells (IPEC-J2): DON Increases Protein Biosynthesis
Source: PubMed Central journal article supplement (PMC6266275; doi:10.3390/toxins10110464), 2018-11-09
Supplement: toxins-10-00464-s001.pdf [file toxins-10-00464-s001.pdf]

# Supplementary Materials: Deoxynivalenol Affects Cell Metabolism and Increases Protein Biosynthesis in Intestinal Porcine Epithelial Cells (IPEC-J2)

## DON Increases Protein Biosynthesis

Constanze Nossol, Peter Landgraf, Stefan Kahlert, Michael Oster, Berend Isermann, Daniela C. Dieterich, Klaus Wimmers, Sven Dänicke and Hermann-Josef Rothkötter

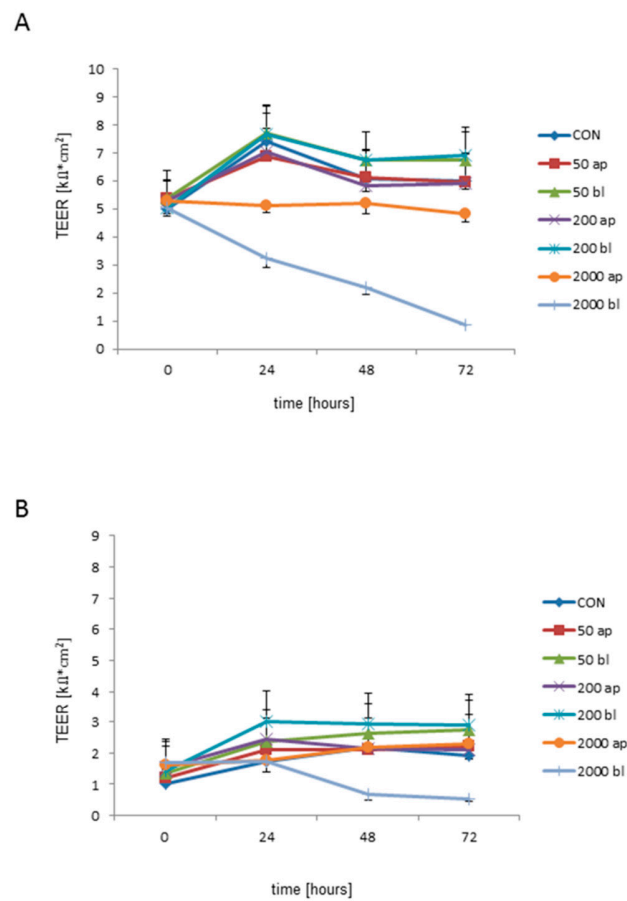

Figure S1. TEER measurements under high (A) and low (B) glucose conditions.
